# Supplementary material for: Spontaneous one dimensional arrangement of spherical Au nanoparticles with liquid crystal ligands
Source: Royal Society of Chemistry journal article supplement (doi:10.1039/b413510e), 2004-12-23

## Supporting information

### Spontaneous One Dimensional Arrangement of Spherical Au Nanoparticles with Liquid Crystal Ligands

Insik In, Young-Wook Jun, Yun Jun Kim, and Sang Youl Kim\*

a) DSC curve and POM image of free LC ligand.

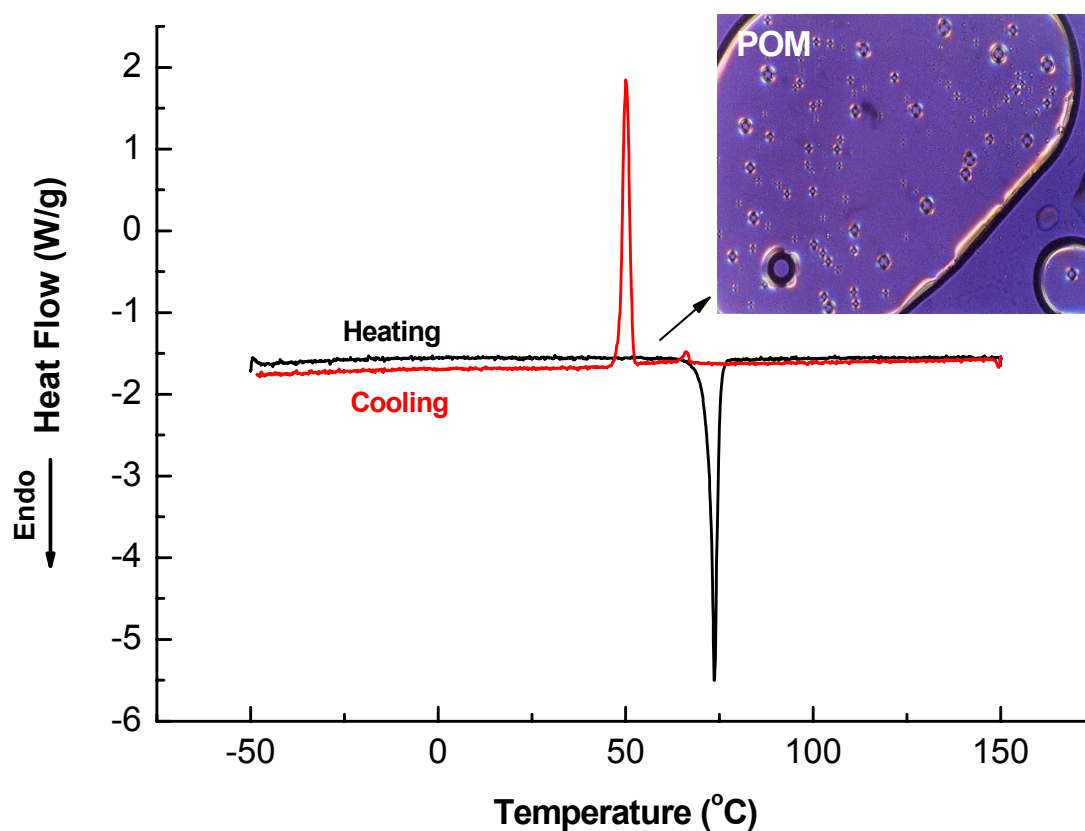

b) DSC curve and TEM image (after thermal treatment) of Au nanoparticle with LC ligands.

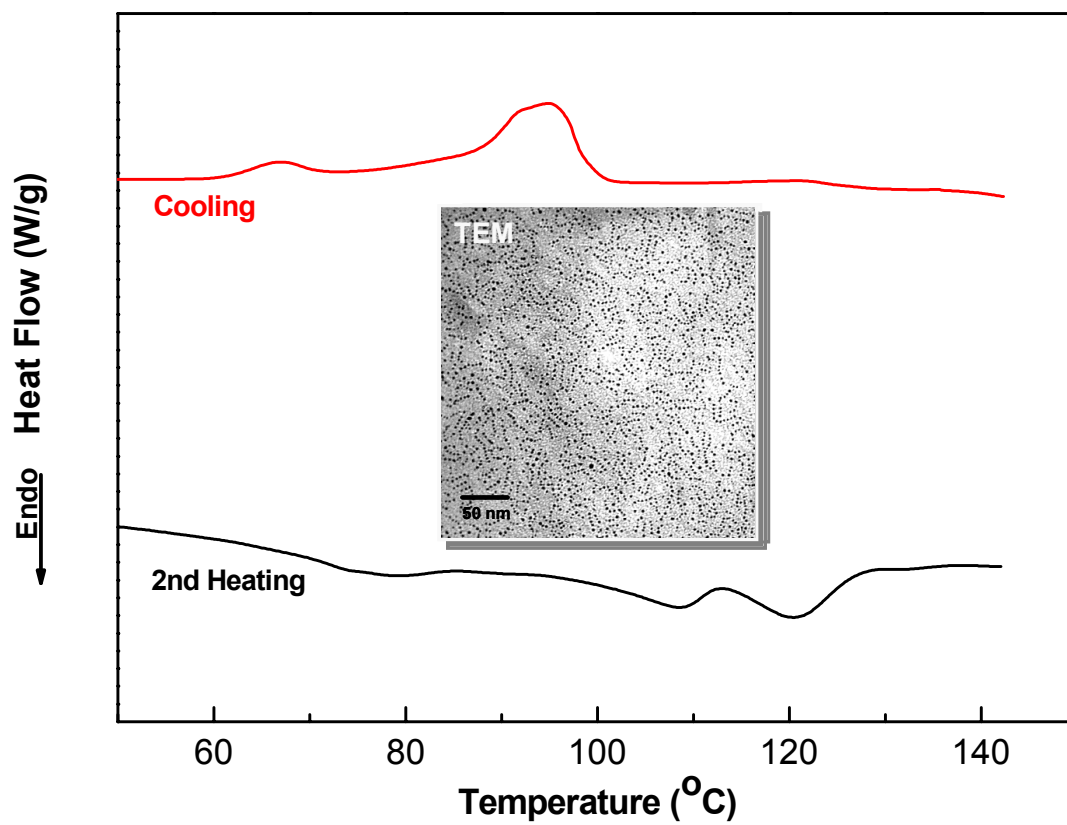

Supplement: b413510e.pdf [file b413510e.pdf]
